# Supplementary material
Source: PubMed Central journal article supplement (PMC2686110)
Supplement: NIHMS109266-supplement-Supplementary_FIgure.pdf [file NIHMS109266-supplement-Supplementary_FIgure.pdf]

**a**

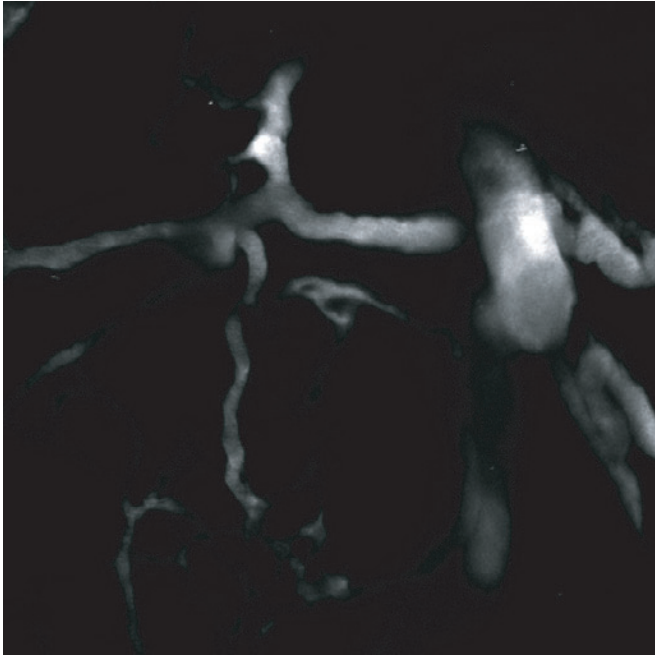

**b**

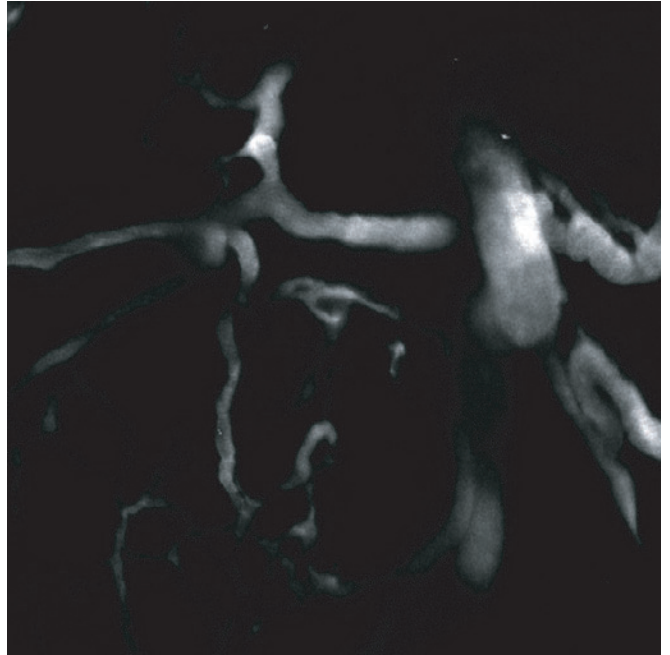

**c**

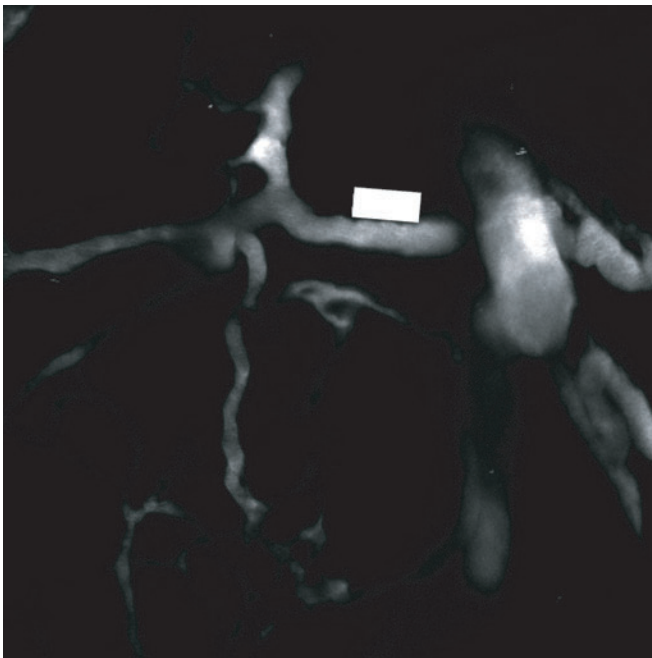

**d**

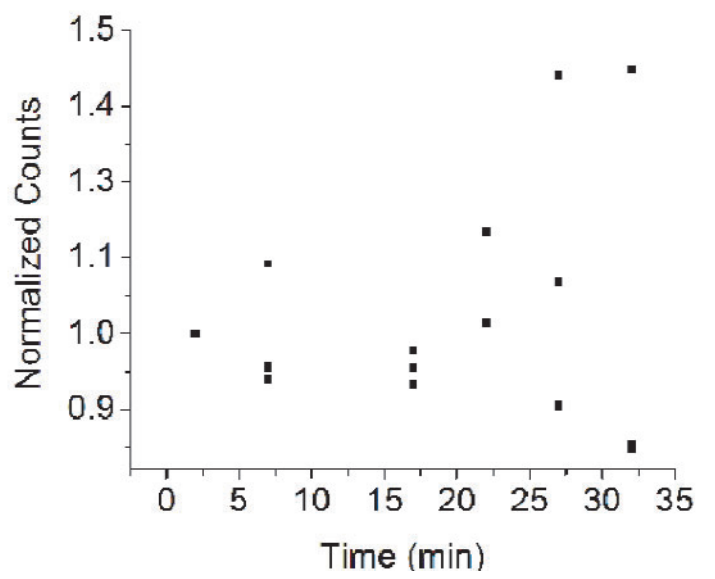

**Supplementary Fig. 1. QD micelle preparation did not accumulate in extravascular space.** The QDs were administered to a SCID mouse bearing a U87 tumor explant in a CW preparation. At given intervals, 62 images were acquired at 5  $\mu$ m/ slice for up to 32 minutes. Depth projections spanning 2 (**a**) to 32 (**b**) minutes do not reveal appreciable accumulation of QD in the interstitium. To confirm quantitatively, three peri-vascular regions of interest were constructed, one of which is depicted as a white rectangle in **c**. The average pixel intensity in these regions of interest was calculated for each acquisition time and scaled to an initial value of 1. **d** The scaled average intensity is not a statistically significant function of time, indicating no appreciable accumulation of QDs in the interstitial matrix. Distance across the bottom of all images is 707  $\mu$ m.
